# Supplementary material for: Endothelial Jagged1 levels and distribution are post-transcriptionally controlled by ZFP36 decay proteins
Source: PubMed Central journal article supplement — Cell Rep. Author manuscript; Available in PMC 2024 Feb 23. (PMC10884959; doi:10.1016/j.celrep.2023.113627), 2023-12-28
Supplement: NIHMS1961506-supplement-1.pdf [file NIHMS1961506-supplement-1.pdf]

**Cell Reports, Volume 43**

**Supplemental information**

**Endothelial Jagged1 levels and distribution  
are post-transcriptionally controlled  
by ZFP36 decay proteins**

**Hannah L. Sunshine, Andrew C. Cicchetto, Karolina Elzbieta Kaczor-Urbanowicz, Feiyang Ma, Danielle Pi, Chloe Symons, Martin Turner, Vipul Shukla, Heather R. Christofk, Thomas A. Vallim, and M. Luisa Iruela-Arispe**

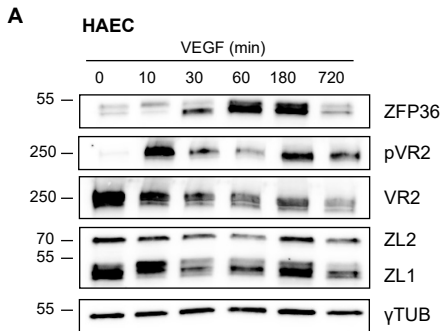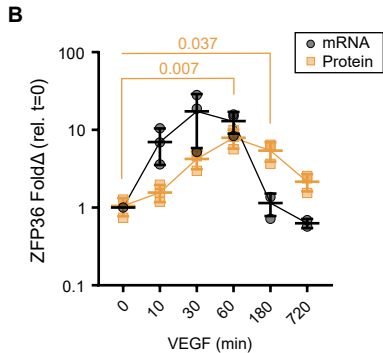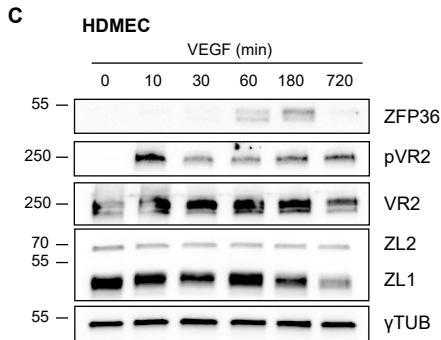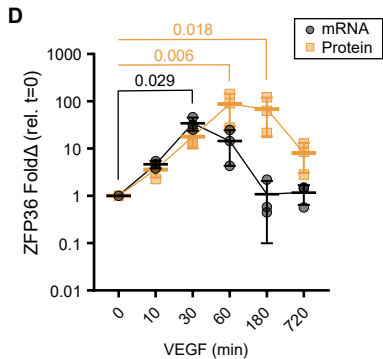

**Figure S1. VEGF triggered induction of ZFP36 is conserved in multiple EC types. Related to Figure 1.**

(A) HAEC representative immunoblots of ZFP36, pVR2, VR2, ZFP36L1, ZFP36L2 and  $\gamma$ TUB from VEGF stimulation time course experiment. Cultures were first incubated in serum-free medium overnight and stimulated with VEGF for the indicated times.

(B) HAEC immunoblot quantification of fold change ( $\Delta$ ) of ZFP36 protein relative to control normalized to  $\gamma$ TUB (n = 3 technical replicates) and qRT-PCR of *ZFP36* transcripts of normalized to *HPRT* (n=3 technical replicates). Data for ZFP36 are individual replicates with line representing mean  $\pm$  SD. Statistical analysis using Kruskal-Wallis with post-hoc Dunn's multiple comparison test.

(C) HDMEC representative immunoblots of ZFP36, pVR2, VR2, ZFP36L1, ZFP36L2 and  $\gamma$ TUB from VEGF stimulation time course experiment. Cultures were first incubated in serum-free medium overnight and stimulated with VEGF for the indicated times.

(D) HDMEC immunoblot quantification of fold change ( $\Delta$ ) of ZFP36 protein relative to control normalized to  $\gamma$ TUB (n = 3 technical replicates) and qRT-PCR of *ZFP36* transcripts normalized to *HPRT* (n=3 technical replicates). Data for ZFP36 are individual replicates with line representing mean  $\pm$  SD. Statistical analysis using Kruskal-Wallis with post-hoc Dunn's multiple comparison test.

Abbreviations: Human aortic endothelial cell (HAEC), human dermal microvascular endothelial cell (HDMEC)



**Figure S2. Jag1 mRNA features facilitate ZFP36 mRNA binding. Related to Figure 2.**

(A) Full mouse JAG1 3'UTR mRNA nucleotide sequence color coded based on relative eCLIP peak height.

(B) Quantification of *Tuba1b*, *Ptgs2*, and *Jag1* mRNA fold change normalized to *Rplpo* from CLIP-qPCR experiment post 40 min serum stimulation of WT relative to TKO *Zfp36/1/1/2* triple-floxed MEF clones (n = 3 technical replicates). Statistical analysis was performed using two-way ANOVA with Sidak's multiple comparison test.

(C) Integrative Genomics Viewer generated from AREsite2<sup>68</sup> identified adenosine-uridine rich element (ARE) motifs in mouse (mm10) and human (hg38) JAG1 3'UTR. Respective chromosome positions are marked with red line. Mouse 3'UTR alignment also includes binding peaks from WT-IP eCLIP-seq experiment with respective track height scale denoted in brackets.

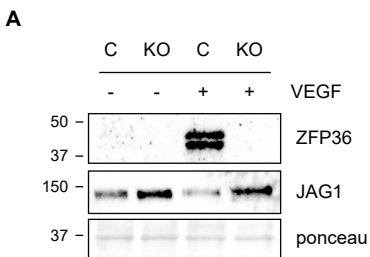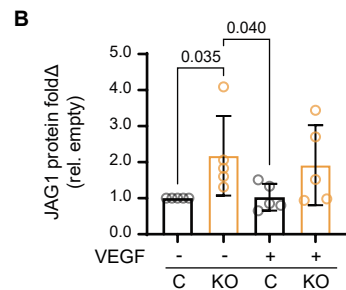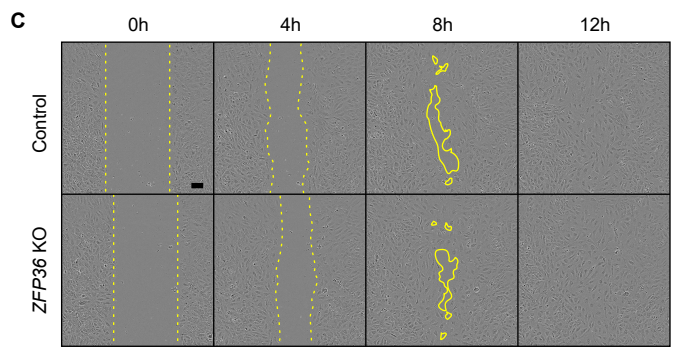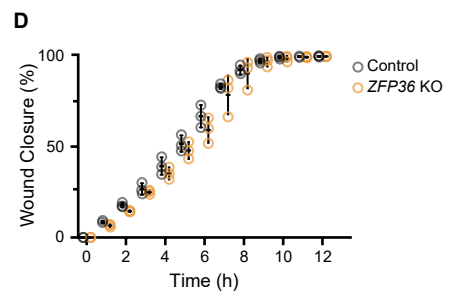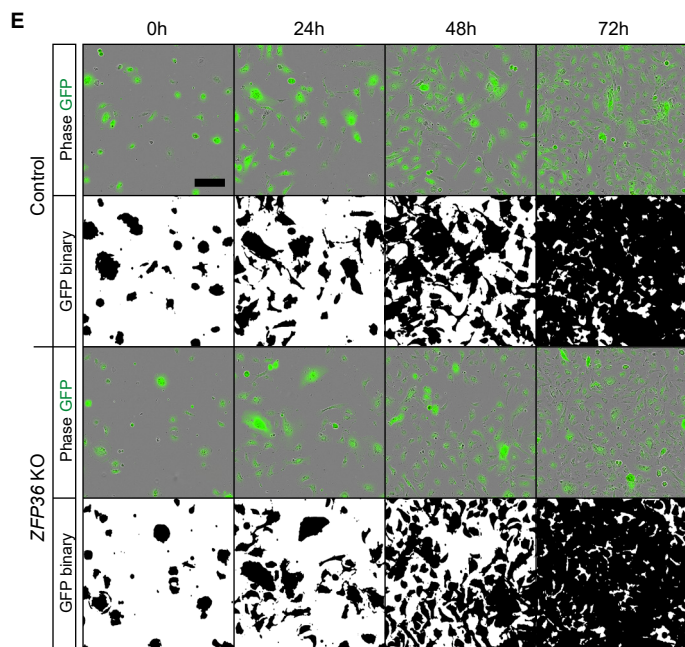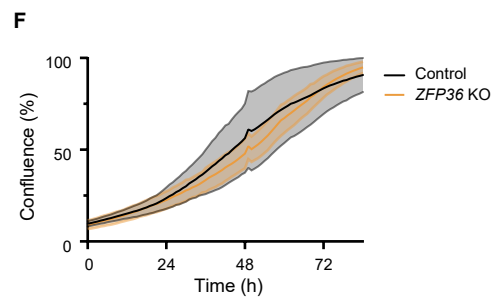

**Figure S3. *In vitro* migration and proliferation are unaffected by ZFP36 KO. Related to Figure 2.**

(A) Representative immunoblots of ZFP36 and JAG1 protein expression from CRISPR control and ZFP36 KO HUVECs stimulated with and without VEGF for 1 h. Ponceau is used as loading control reference.

(B) Quantification of WB results fold change ( $\Delta$ ) in relative to empty control normalized to total protein (mean  $\pm$  SD, n = 5 biological replicates). Statistical analysis using Kruskal-Wallis with post-hoc Dunn's multiple comparison test.

(C) Representative phase images from scratch assay using CRISPR control and ZFP36 KO HUVECs at indicated times. Empty culture area indicated with yellow outlines (scale bar = 100  $\mu$ m).

(D) Quantification of scratch assay wound closure (%) area fraction (mean  $\pm$  SD) measured at 1h increments (n = 3 biological replicates, each averaged from at least 4 technical replicates).

(E) Representative overlay phase and fluorescence images from proliferation assay using CRISPR control and ZFP36 KO HUVECs infected with CMV-GFP lentivirus. Binary GFP images were used for confluence quantification (scale bar = 100  $\mu$ m).

(F) Quantification of mean confluence overtime (%) calculated from GFP binary area fraction (mean line  $\pm$  SD) measured at 1h increments (n = 2 biological replicates, 4 technical replicates each).

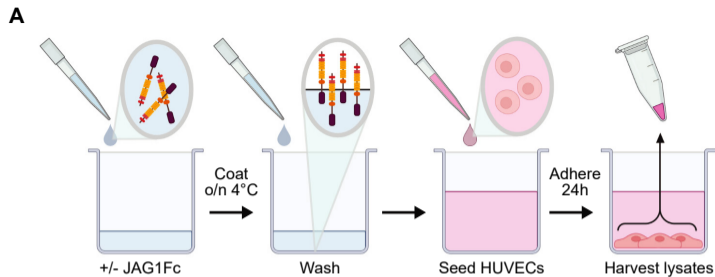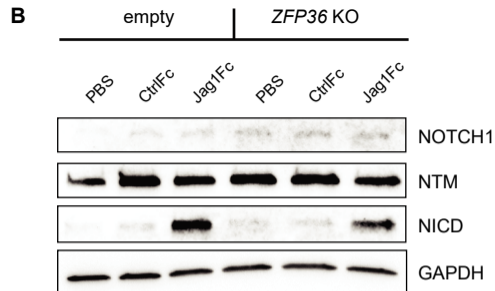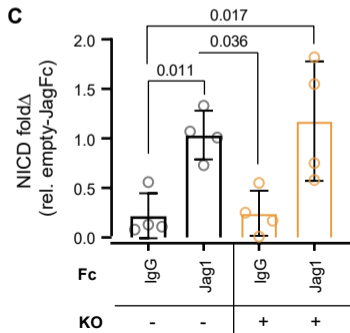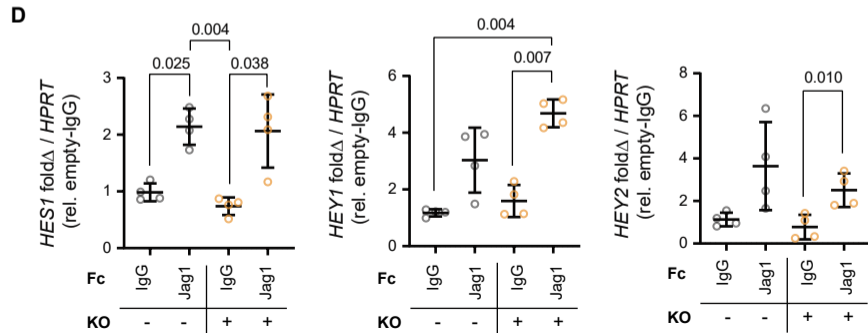



**Figure S4. Trans-endothelial Notch activation is preserved in ZFP36 KO cells when presented exogenous ligand. Related to Figure 5.**

(A) Schematic diagramming experimental design of JAG1Fc-coated plate assay. After coating human recombinant JAG1Fc overnight on tissue culture plate, HUVECs are seeded on top to confluence and allowed to adhere for 24 h before harvesting for Notch signaling analysis.

(B) Representative immunoblots of full-length NOTCH1, NOTCH1 transmembrane fragment (NTM), cleaved NOTCH1 (NICD), and GAPDH from CRISPR empty or *zfp36*KO HUVECs post-24 h culture on JAG1-Fc coated plates.

(C) Quantification of fold change ( $\Delta$ ) of ZFP36 protein relative to control normalized to housekeeping protein GAPDH or  $\gamma$ TUB ( $n = 4$  biological replicates). Statistical analysis using Kruskal-Wallis with post-hoc uncorrected Dunn's test.

(D) Quantification of downstream NOTCH1 target genes *HES1*, *HEY1*, and *HEY2* mRNA mean fold change  $\pm$  SD by qRT-PCR from HUVEC JAG1-Fc experiments relative to CRISPR empty IgG cultured cells. Cq-values normalized to *HPRT* ( $n = 4$  biological replicates). Statistical analysis performed using Kruskal-Wallis with post-hoc Dunn's multiple comparison test.

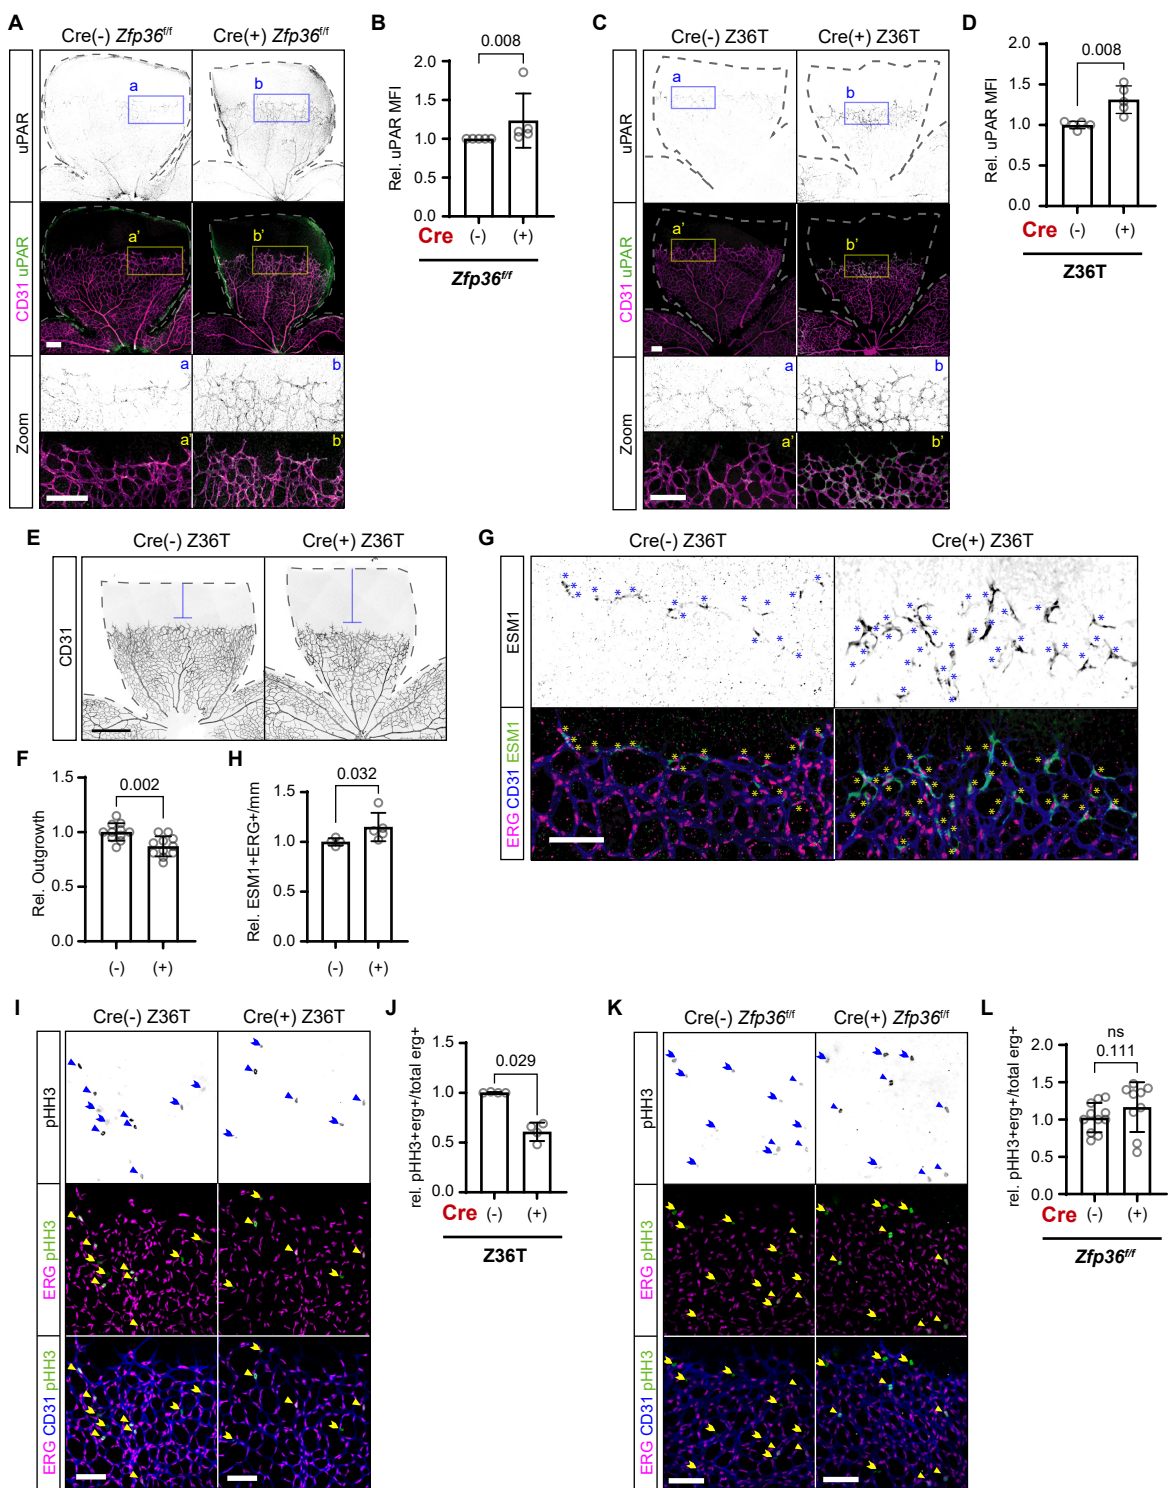

**Figure S5. Increased severity of ZFP family member triple EC-KO involves additional changes in cell proliferation. Related to Figure 7.**

(A) Representative uPAR and CD31 IHC of TAM fed inducible *Cdh5-Cre Zfp36<sup>ff</sup>* mice. Dashed lines outline retina area (low magnification scale bar = 200  $\mu\text{m}$ ; zoom scale bar = 100  $\mu\text{m}$ ).

(B) Quantification of uPAR MFI  $\pm$  SD within CD31+ area of TAM fed inducible *Cdh5-Cre Zfp36<sup>ff</sup>* mice relative to respective littermate *Cre(-)* controls (n = 5 replicates each; pairs from 5 independent litters). Statistical analysis performed using Mann-Whitney test.

(C) Representative uPAR and CD31 IHC of TAM fed Z36T mice. Dashed lines outline retina area (low magnification scale bar = 300  $\mu\text{m}$ ; zoom scale bar = 100  $\mu\text{m}$ ).

(D) Quantification of uPAR MFI  $\pm$  SD within CD31+ area of TAM fed Z36T mice relative to respective littermate *Cre(-)* controls (n = 4 animals each). Statistical analysis performed using Mann-Whitney test.

(E) Representative CD31 IHC of TAM fed Z36T mice. Dashed lines outline retina area and blue bracket indicates angiogenic outgrowth based on remaining retina area (scale bar = 500  $\mu\text{m}$ ).

(F) Quantification of outgrowth (CD31+ area/total area) averaged per animal of TAM Z36T mice retina relative to average littermate control (mean  $\pm$  SD; n = 11 animals each, derived from 5 independent litters).

(G) Representative CD31, ESM1, and ERG immunohistochemistry of TAM fed Z36T mice. Asterisks indicate ESM1+ ERG (scale bar = 100  $\mu\text{m}$ ).

(H) Quantification of ESM1+ ERG normalized to width of angiogenic front (mm) of TAM fed Z36T mice relative to average littermate control (mean  $\pm$  SD; n = 4 *Cre(-)* and 5 *Cre(+)* animals, derived from 3 independent litters).

(I) Representative IHC of pHH3, ERG, and CD31 from TAM fed Z36T mice. pHH3<sup>+</sup>ERG<sup>+</sup> (arrowheads) and pHH3<sup>+</sup>ERG<sup>-</sup> (chevrons) are indicated (scale bar = 100  $\mu\text{m}$ ).

(J) Quantification of pHH3<sup>+</sup> ERG normalized to total ERG of TAM fed Z36T mice relative to average littermate control (mean  $\pm$  SD; n = 4 animals each, derived from 3 independent litters). Statistical analysis performed using Mann-Whitney test.

(K) Representative IHC of pHH3, ERG, and CD31 from TAM fed *CDH5-Cre zfp36<sup>ff</sup>* mice. pHH3<sup>+</sup>ERG<sup>+</sup> (arrowheads) and pHH3<sup>+</sup>ERG<sup>-</sup> (chevrons) cells are indicated (scale bar = 100  $\mu\text{m}$ ).

(L) Quantification of pHH3<sup>+</sup> ERG normalized to total ERG of TAM fed *CDH5-Cre zfp36<sup>ff</sup>* mice relative to average littermate control (mean  $\pm$  SD; n = 11 *Cre(-)* and 9 *Cre(+)* animals, derived from >3 independent litters). Statistical analysis performed using Mann-Whitney test.

**TABLE S1 - SUPPLEMENTARY TABLE 1 RELATED TO STAR METHODS - qPCR primers**

| <b>qPCR primers</b> |                        |                         |         |                               |
|---------------------|------------------------|-------------------------|---------|-------------------------------|
| Gene                | Forward (5' to 3')     | Reverse (5' to 3')      | Species | Source                        |
| ZFP36               | GACTGAGCTATGTCGGACCTT  | GAGTCCGTCTTGTATTTGGGG   | Human   | This paper                    |
| ZFP36L1             | GATGACCACCACCTCGT      | TGGGAGCACTATAGTTGAGCATC | Human   | This paper                    |
| ZFP36L2             | CTGCTGCTGACTGCGGTA     | ATCCAGACCCACAACCTTGC    | Human   | This paper                    |
| JAG1                | GACTCATCAGCCGTGTCTCA   | TGGGGAACACTCACACTCAA    | Human   | This paper                    |
| HPRT                | GCCCTGGCGTCGTGATTAGT   | AGCAAGACGTTCAGTCCTGTC   | Human   | Mack et al <sup>56</sup>      |
| Jag1                | CGTAGAGTACACTGCCTGCC   | CAAGTATCTCCCCAGTCCCG    | Mouse   | Cicchetto et al <sup>26</sup> |
| Tuba1b              | GAGACCCGGTGTCTGCTTC    | GAGATGCACTCACGCATGATA   | Mouse   | Cicchetto et al <sup>26</sup> |
| Ptgs2               | TGAGTACCGCAAACGCTTCT   | CAGCCATTTCTTCTCTCCTGT   | Mouse   | Cicchetto et al <sup>26</sup> |
| Rplpo               | CACTGGTCTAGGACCCGAGAAG | GGTGCCTCTGGAGATTTTCG    | Mouse   | Cicchetto et al <sup>26</sup> |
|                     |                        |                         |         |                               |
|                     |                        |                         |         |                               |
|                     |                        |                         |         |                               |
|                     |                        |                         |         |                               |
